# Supplementary material for: Projected intensification of sub-daily and daily rainfall extremes in convection-permitting climate model simulations over NorthAmerica: Implications for future Intensity–Duration–Frequency curves
Source: Copernicus journal article supplement (doi:10.5194/nhess-2018-290), 2018-10-16
Supplement: Supplementary file 1 [file nhess-2018-290-supplement.pdf]

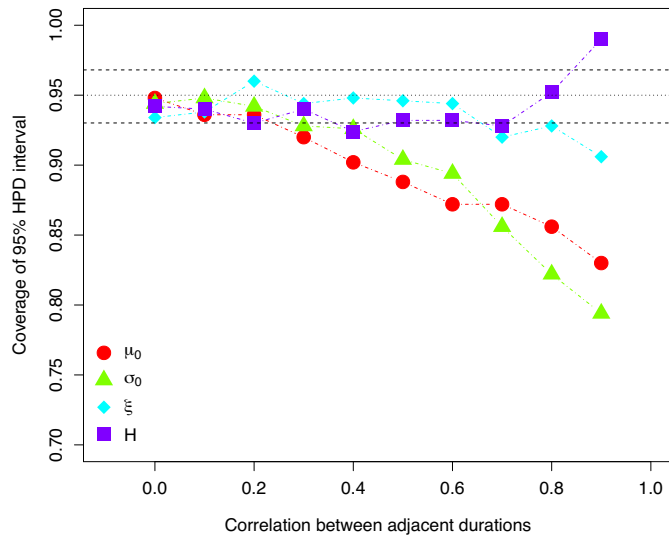

Figure S1: Coverage of 95% Highest Posterior Density (HPD) credible intervals for fitted GEVSS location  $\mu_0$ , scale  $\sigma_0$ , shape  $\xi$ , and scaling exponent  $H$  parameters based on 501 Monte Carlo simulations from the same specified GEVSS distribution – with parameters drawn from the prior distributions in Section 4 – but with different levels of correlation between adjacent simulated accumulation durations (i.e., lack of independence). The sample size is set to 13-yr to match the length of the WRF simulations. The nominal coverage level is shown by the dotted horizontal line, with dashed lines showing the 95% acceptance region based on 501 Monte Carlo simulations.

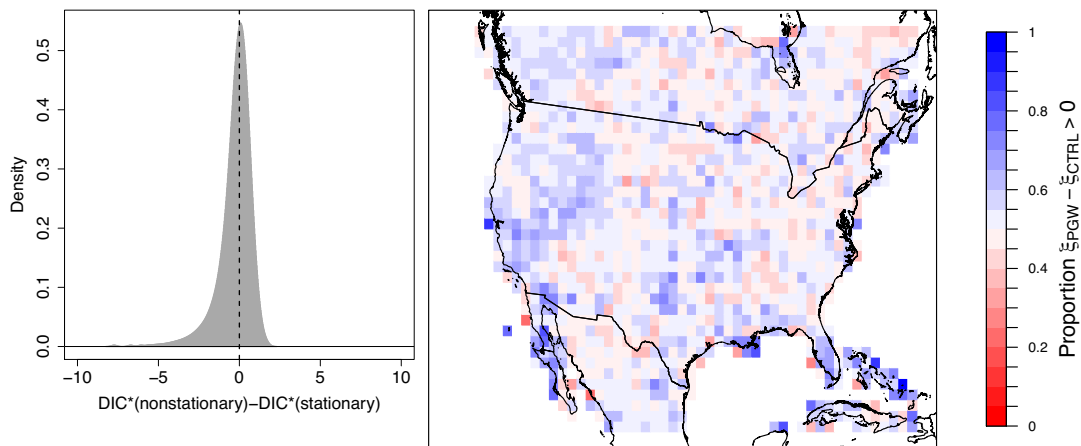

Figure S2: Lesaffre and Lawson (2012) state that “The rule of thumb for using DIC in model selection is roughly the same as for AIC and BIC, namely, a difference in DIC of more than 10 rules out the model with the higher DIC while with a difference of less than 5 there is no clear winner.” (a) shows the distribution of  $DIC^*$  differences between models with nonstationary and stationary  $\xi$  over the HRCONUS domain; 99.4% of grid points have values of  $|\Delta DIC^*| < 5$ , while fewer than 0.03% of grid points have magnitudes that exceed 10. (b) Spatial distribution of posterior probability of an increase in  $\xi$  in the nonstationary model; values shown are aggregated  $100\text{-km} \times 100\text{-km}$  grid box means. The mean (median) posterior probability of an increase in  $\xi$  is 0.53 (0.52). Statistically significant increases are found at 5.2% of grid points versus decreases at 2.6% of grid points.

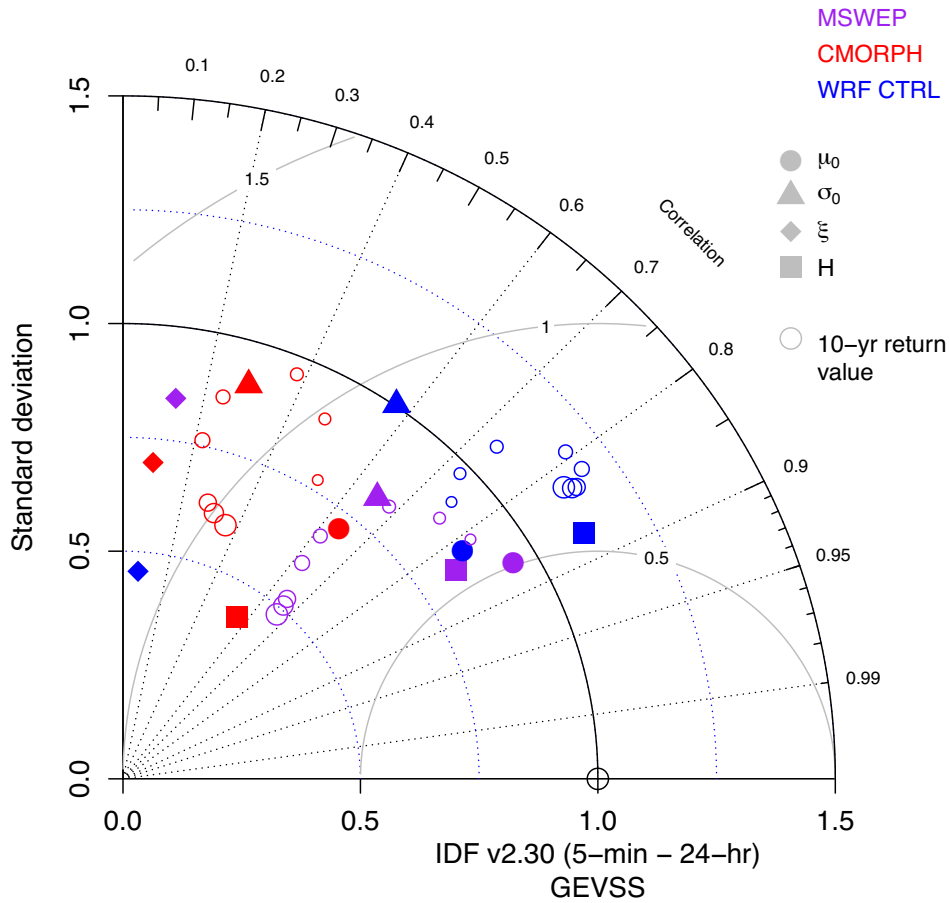

Figure S3: Taylor diagram showing spatial pattern correlations and standard deviations of estimated GEVSS parameters (and 10-yr return levels for different durations – larger open circles indicate shorter durations) for MSWEP, CMORPH, and WRF CTRL at the 488 IDF curve TBRG stations shown in Figure 1. Observational reference values are based on fitting the GEVSS distribution to observed 5-min to 24-hr annual maxima at the TBRG locations. Data are standardized based on the observational reference variability.

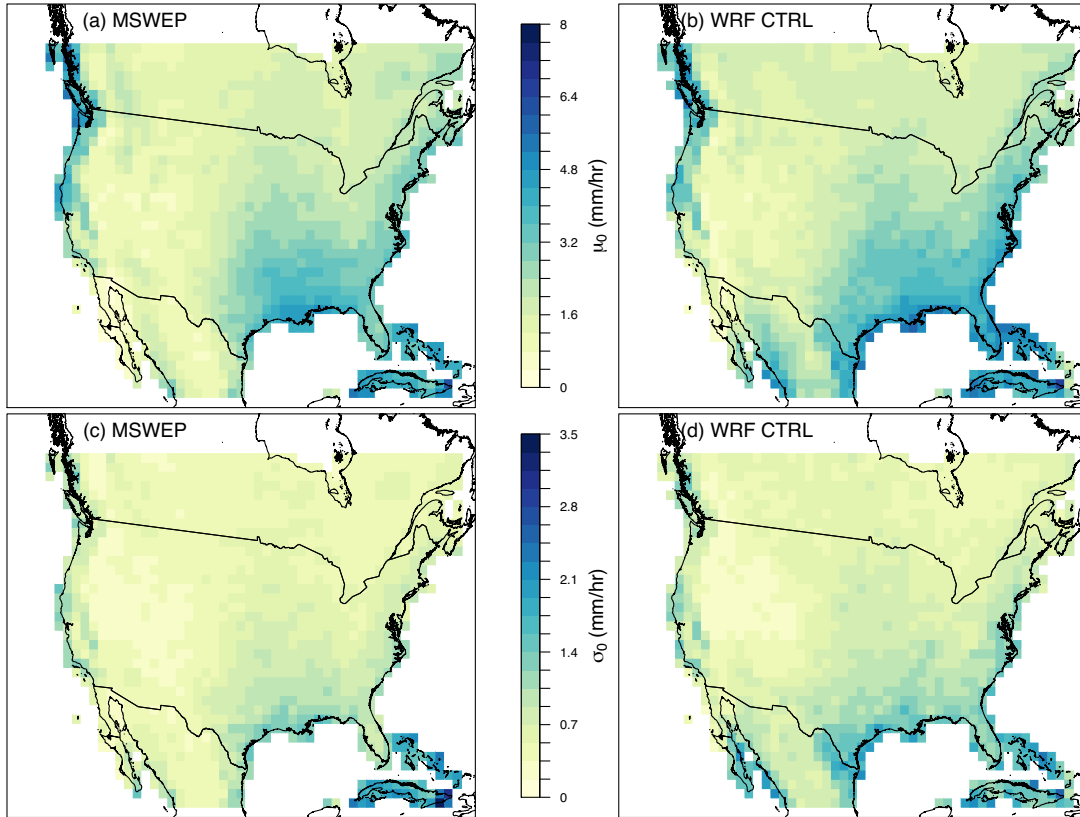

Figure S4: Posterior mean values of the GEVSS location parameter  $\mu_0$  for (a) MSWEP and (b) WRF CTRL; and scale parameter  $\sigma_0$  for (c) MSWEP and (d) WRF CTRL. For ease of visualization, results are aggregated to a 100-km  $\times$  100-km grid. Values shown are aggregated grid box means.



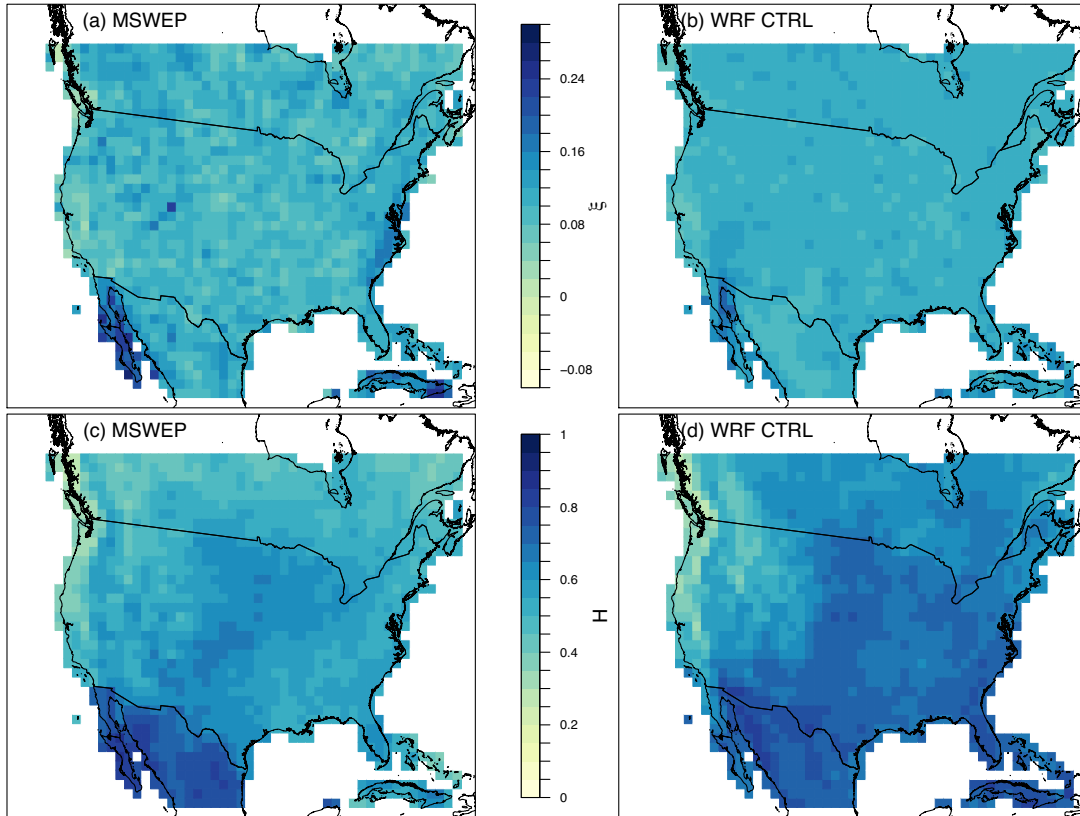

Figure S5: As in Figure S4, but for the GEVSS shape parameter  $\xi$  for (a) MSWEP and (b) WRF CTRL, and for the scaling exponent parameter  $H$  for (c) MSWEP and (d) WRF CTRL.

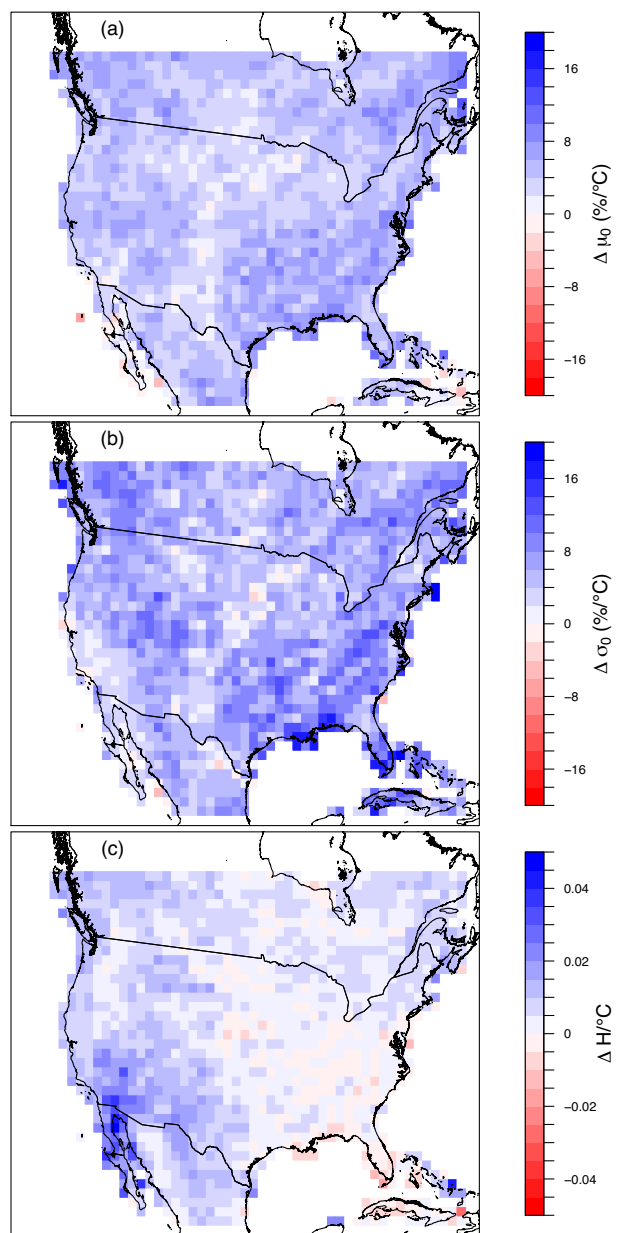

Figure S6: Temperature scaling of GEVSS location  $\mu_0$ , scale  $\sigma_0$ , and scaling exponent  $H$  parameters based on changes between the WRF CTRL and PGW simulations; values shown are aggregated 100-km  $\times$  100-km grid box means.
